# Supplementary material for: Dust Events and Indoor Air Quality in Residential Homes in Kuwait
Source: PubMed Central journal article supplement (PMC7178282; doi:10.3390/ijerph17072433), 2020-04-03
Supplement: ijerph-17-02433-s001.pdf [file ijerph-17-02433-s001.pdf]

**Supplemental Material:**

**Table S1:** Summary of median and distribution of indoor and outdoor PM<sub>2.5</sub> species concentrations

| Species     | Indoor Concentration<br>N=13 |       |       |       | Outdoor Concentration<br>N=13 |       |       |       |
|-------------|------------------------------|-------|-------|-------|-------------------------------|-------|-------|-------|
|             | Median                       | IQR   | Min   | Max   | Median                        | IQR   | Min   | Max   |
| <b>Mass</b> | 23.85                        | 20.67 | 3.901 | 74.36 | 43.78                         | 9.397 | 28.74 | 58.07 |
| <b>BC</b>   | 2.073                        | 0.961 | 0.378 | 4.192 | 3.379                         | 0.961 | 2.795 | 5.691 |
| <b>Na</b>   | 0.232                        | 0.087 | 0.020 | 0.419 | 0.413                         | 0.119 | 0.245 | 0.609 |
| <b>Mg</b>   | 0.097                        | 0.080 | 0.014 | 0.275 | 0.327                         | 0.130 | 0.195 | 0.457 |
| <b>Al</b>   | 0.236                        | 0.160 | 0.052 | 0.919 | 0.830                         | 0.459 | 0.560 | 1.559 |
| <b>Si</b>   | 0.510                        | 0.413 | 0.080 | 2.138 | 1.734                         | 1.096 | 1.125 | 3.611 |
| <b>S</b>    | 2.406                        | 1.461 | 0.526 | 5.199 | 3.727                         | 1.900 | 2.333 | 8.639 |
| <b>Cl</b>   | 0.036                        | 0.031 | 0.002 | 0.117 | 0.041                         | 0.029 | 0.010 | 0.187 |
| <b>K</b>    | 0.185                        | 0.113 | 0.035 | 0.666 | 0.420                         | 0.128 | 0.279 | 0.687 |
| <b>Ca</b>   | 0.252                        | 0.361 | 0.048 | 1.336 | 1.365                         | 0.508 | 0.814 | 2.431 |
| <b>Ti</b>   | 0.012                        | 0.014 | 0.002 | 0.052 | 0.055                         | 0.028 | 0.035 | 0.094 |
| <b>V</b>    | 0.009                        | 0.004 | 0.002 | 0.013 | 0.016                         | 0.005 | 0.012 | 0.027 |
| <b>Cr</b>   | 0.001                        | 0.000 | 0.000 | 0.002 | 0.003                         | 0.001 | 0.002 | 0.004 |
| <b>Mn</b>   | 0.006                        | 0.004 | 0.001 | 0.013 | 0.019                         | 0.008 | 0.012 | 0.030 |
| <b>Fe</b>   | 0.186                        | 0.160 | 0.033 | 0.663 | 0.779                         | 0.367 | 0.542 | 1.272 |
| <b>Ni</b>   | 0.003                        | 0.002 | 0.001 | 0.004 | 0.006                         | 0.002 | 0.004 | 0.009 |
| <b>Cu</b>   | 0.008                        | 0.005 | 0.002 | 0.031 | 0.018                         | 0.010 | 0.010 | 0.037 |
| <b>Zn</b>   | 0.045                        | 0.033 | 0.003 | 0.067 | 0.067                         | 0.038 | 0.034 | 0.251 |
| <b>Br</b>   | 0.014                        | 0.008 | 0.001 | 0.023 | 0.024                         | 0.005 | 0.014 | 0.036 |
| <b>Sr</b>   | 0.002                        | 0.002 | 0.001 | 0.008 | 0.009                         | 0.003 | 0.005 | 0.012 |
| <b>Zr</b>   | 0.002                        | 0.001 | 0.000 | 0.004 | 0.004                         | 0.002 | 0.003 | 0.007 |

Concentrations are expressed in  $\mu\text{g}/\text{m}^3$

**Table S2:** Summary of median and distribution of indoor and outdoor PM<sub>10</sub> species concentrations

| Species     | Indoor Concentration<br>N=7 |       |       |       | Outdoor Concentration<br>N=7 |       |       |        |
|-------------|-----------------------------|-------|-------|-------|------------------------------|-------|-------|--------|
|             | Median                      | IQR   | Min   | Max   | Median                       | IQR   | Min   | Max    |
| <b>Mass</b> | 35.11                       | 28.06 | 18.31 | 76.46 | 119.5                        | 16.75 | 86.76 | 145.6  |
| <b>BC</b>   | 2.683                       | 1.185 | 1.521 | 4.293 | 4.139                        | 1.420 | 3.728 | 6.683  |
| <b>Na</b>   | 0.284                       | 0.071 | 0.208 | 0.430 | 0.322                        | 0.124 | 0.193 | 0.462  |
| <b>Mg</b>   | 0.273                       | 0.273 | 0.089 | 0.669 | 1.042                        | 0.227 | 0.800 | 1.203  |
| <b>Al</b>   | 0.672                       | 0.791 | 0.207 | 2.416 | 2.524                        | 0.527 | 2.144 | 4.018  |
| <b>Si</b>   | 1.568                       | 1.747 | 0.418 | 5.799 | 6.478                        | 1.408 | 5.481 | 10.331 |
| <b>S</b>    | 2.560                       | 1.155 | 1.833 | 3.669 | 4.173                        | 1.600 | 2.140 | 6.400  |
| <b>Cl</b>   | 0.072                       | 0.035 | 0.014 | 0.102 | 0.144                        | 0.022 | 0.029 | 0.626  |
| <b>K</b>    | 0.289                       | 0.390 | 0.208 | 0.949 | 0.926                        | 0.174 | 0.853 | 1.393  |
| <b>Ca</b>   | 1.390                       | 2.148 | 0.343 | 5.121 | 7.827                        | 1.585 | 7.082 | 10.999 |
| <b>Ti</b>   | 0.043                       | 0.066 | 0.015 | 0.158 | 0.212                        | 0.046 | 0.189 | 0.324  |
| <b>V</b>    | 0.011                       | 0.005 | 0.007 | 0.017 | 0.024                        | 0.004 | 0.018 | 0.026  |
| <b>Cr</b>   | 0.002                       | 0.003 | 0.001 | 0.007 | 0.014                        | 0.002 | 0.010 | 0.017  |
| <b>Mn</b>   | 0.012                       | 0.018 | 0.006 | 0.038 | 0.060                        | 0.018 | 0.050 | 0.086  |
| <b>Fe</b>   | 0.596                       | 0.841 | 0.231 | 1.995 | 3.064                        | 0.644 | 2.559 | 4.331  |
| <b>Ni</b>   | 0.004                       | 0.003 | 0.003 | 0.008 | 0.015                        | 0.002 | 0.010 | 0.017  |
| <b>Cu</b>   | 0.012                       | 0.015 | 0.008 | 0.041 | 0.035                        | 0.027 | 0.023 | 0.072  |
| <b>Zn</b>   | 0.059                       | 0.026 | 0.041 | 0.087 | 0.129                        | 0.105 | 0.080 | 0.377  |
| <b>Br</b>   | 0.020                       | 0.007 | 0.011 | 0.024 | 0.029                        | 0.003 | 0.026 | 0.044  |
| <b>Sr</b>   | 0.010                       | 0.013 | 0.003 | 0.025 | 0.046                        | 0.010 | 0.032 | 0.061  |
| <b>Zr</b>   | 0.004                       | 0.007 | 0.000 | 0.011 | 0.012                        | 0.010 | 0.010 | 0.022  |

Concentrations are expressed in  $\mu\text{g}/\text{m}^3$

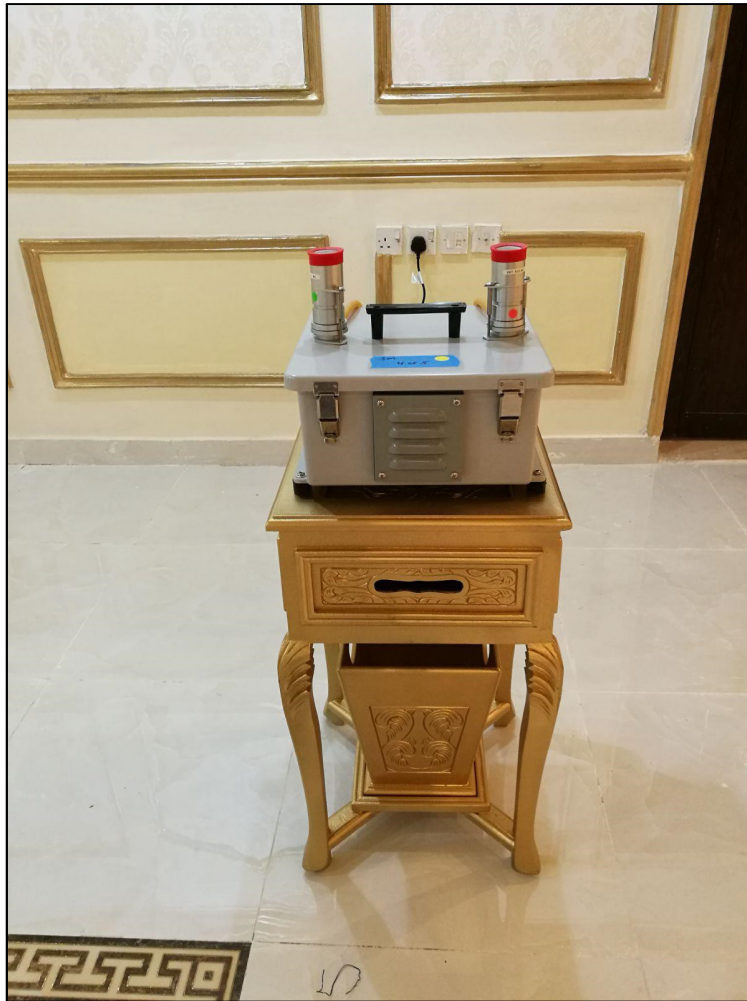

**Figure S1:** Harvard samplers collecting PM<sub>10</sub> and PM<sub>2.5</sub> inside a Kuwaiti home.

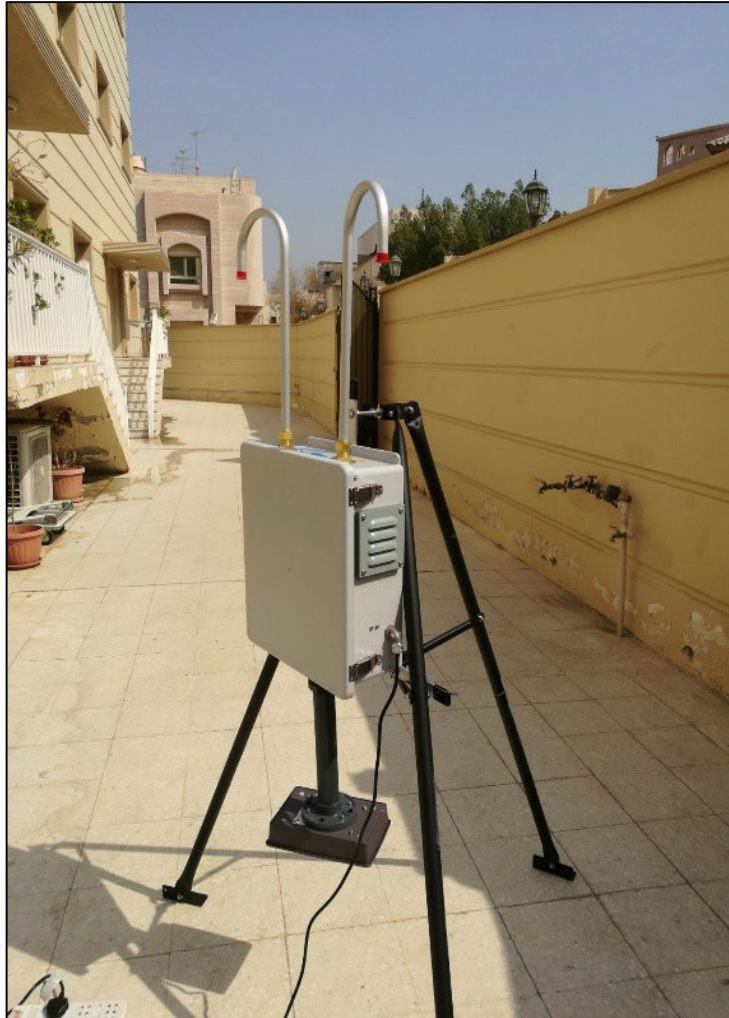

**Figure S2:** Harvard samplers collecting  $PM_{10}$  and  $PM_{2.5}$  outside a Kuwaiti home.

**Table S3:** P-values from Shapiro-Wilks test of normality, t-test with identity means, t-test with log-transformed means, and Wilcoxon test, comparing fine element indoor to outdoor concentration in dust events versus no dust events (Corresponds to Figure 2)

| <b>Species</b> | <b>Shapiro-Wilks test</b> | <b>t-test</b> | <b>log t-test</b> | <b>Wilcoxon<sup>a</sup></b> |
|----------------|---------------------------|---------------|-------------------|-----------------------------|
| <b>Mass</b>    | 0.012                     | 0.042         | 0.019             | 0.014                       |
| <b>BC</b>      | 0.943                     | 0.040         | 0.075             | 0.022                       |
| <b>Na</b>      | 0.999                     | 0.167         | 0.228             | 0.138                       |
| <b>Mg</b>      | 0.548                     | 0.038         | 0.059             | 0.022                       |
| <b>Al</b>      | 0.169                     | 0.060         | 0.063             | 0.022                       |
| <b>Si</b>      | 0.200                     | 0.063         | 0.054             | 0.022                       |
| <b>S</b>       | 0.146                     | 0.118         | 0.135             | 0.101                       |
| <b>Cl</b>      | 0.104                     | 0.005         | 0.005             | 0.002                       |
| <b>K</b>       | 0.100                     | 0.091         | 0.055             | 0.035                       |
| <b>Ca</b>      | 0.160                     | 0.049         | 0.035             | 0.022                       |
| <b>Ti</b>      | 0.102                     | 0.056         | 0.047             | 0.022                       |
| <b>V</b>       | 0.868                     | 0.021         | 0.046             | 0.014                       |
| <b>Cr</b>      | 0.049                     | 0.110         | 0.047             | 0.073                       |
| <b>Mn</b>      | 0.691                     | 0.021         | 0.050             | 0.014                       |
| <b>Fe</b>      | 0.262                     | 0.049         | 0.053             | 0.022                       |
| <b>Ni</b>      | 0.864                     | 0.024         | 0.046             | 0.051                       |
| <b>Cu</b>      | 0.361                     | 0.466         | 0.231             | 0.234                       |
| <b>Zn</b>      | 0.266                     | 0.071         | 0.077             | 0.035                       |
| <b>Br</b>      | 0.728                     | 0.004         | 0.047             | 0.005                       |
| <b>Sr</b>      | 0.018                     | 0.140         | 0.093             | 0.101                       |
| <b>Zr</b>      | 0.411                     | 0.159         | 0.452             | 0.366                       |

<sup>a</sup> We were not able to rely on Wilcoxon tests due to the high number of ties

**Table S4:** P-values from Shapiro-Wilks test of normality, t-test with identity means, t-test with log-transformed means, and Wilcoxon test, comparing coarse-to-fine mean ratios in indoor versus outdoor. (Corresponds to Figure 3)

| <b>Elements</b> | <b>Shapiro Wilks</b> | <b>t-test</b> | <b>log t-test</b> | <b>Wilcoxon<sup>a</sup></b> |
|-----------------|----------------------|---------------|-------------------|-----------------------------|
| <b>Mass</b>     | 0.157                | <0.001        | 0.001             | <0.001                      |
| <b>Fe</b>       | 0.250                | <0.001        | 0.002             | 0.001                       |
| <b>Ca</b>       | 0.114                | <0.001        | <0.001            | 0.001                       |
| <b>Si</b>       | 0.425                | 0.001         | 0.011             | 0.001                       |
| <b>Al</b>       | 0.107                | 0.003         | 0.011             | 0.007                       |
| <b>Ti</b>       | 0.405                | <0.001        | 0.000             | 0.001                       |
| <b>K</b>        | 0.451                | <0.001        | 0.002             | 0.001                       |

<sup>a</sup> We were not able to rely on Wilcoxon tests due to the high number of ties

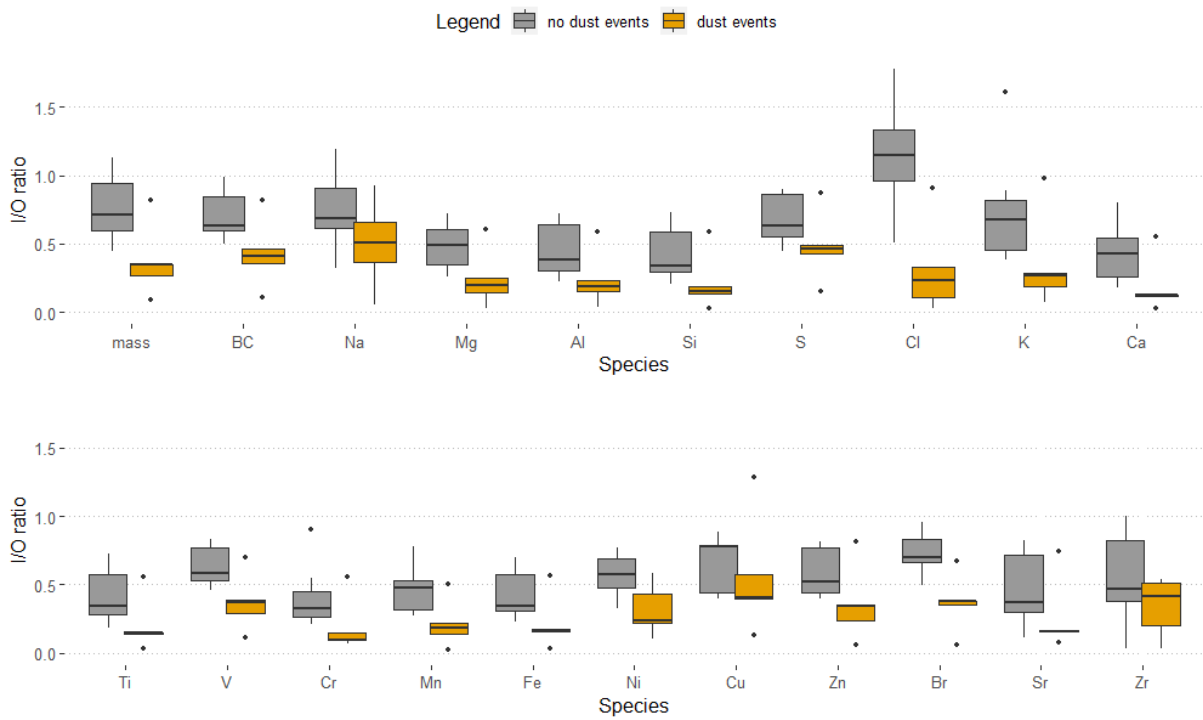

**Figure S3:** Box plots illustrate the difference between I/O concentration ratios of PM<sub>2.5</sub> mass, BC and 19 elements during dust and non-dust events after excluding H<sub>2</sub>.

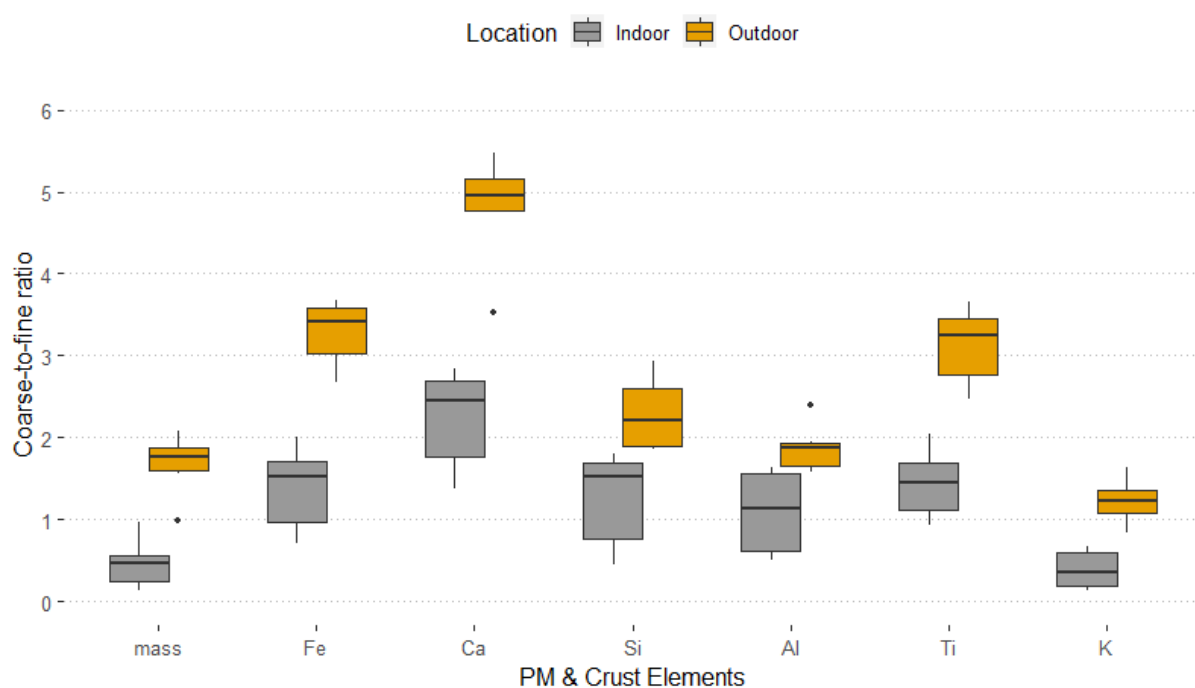

**Figure S4:** Box plot illustrates coarse-to-fine particle ratios of mass and elements measured indoors and outdoors after excluding H2.



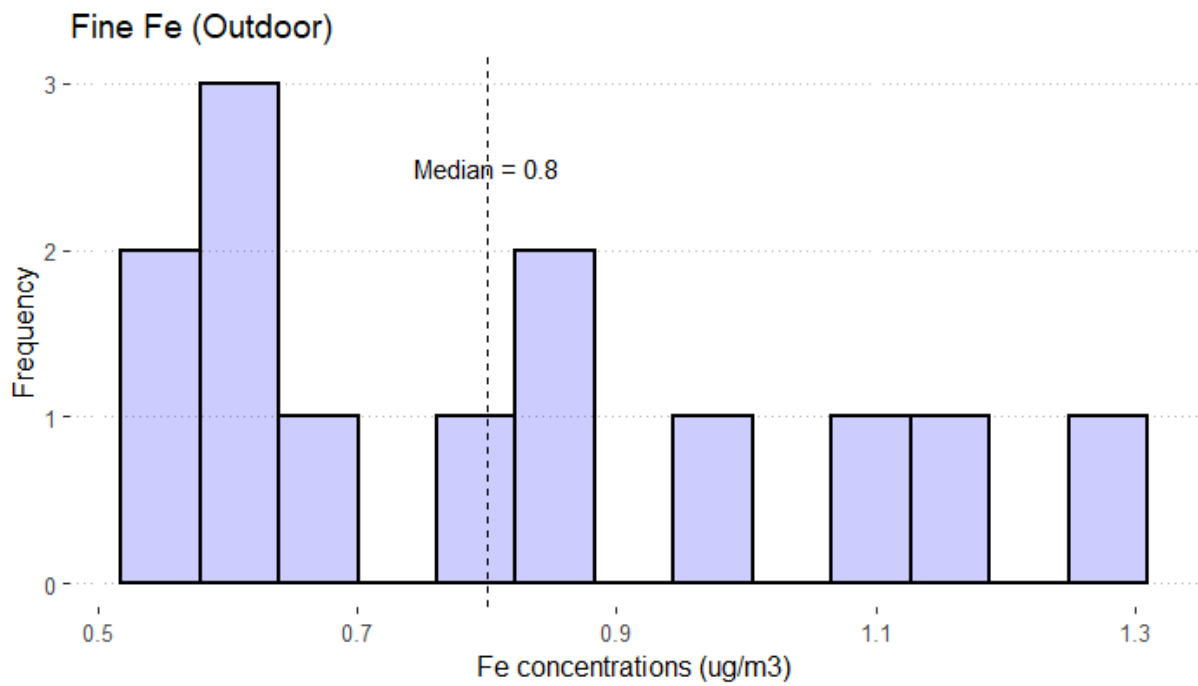

**Figure S5:** Histogram illustrates the median of outdoor fine Fe concentrations that we utilized as a threshold for dust storm events identification.
